# Supplementary material for: Analysis of Rates of Completion, Delays, and Participant Recruitment in Randomized Clinical Trials in Surgery
Source: PubMed Central journal article supplement (PMC9857498; doi:10.1001/jamanetworkopen.2022.50996), 2023-01-17
Supplement: jamanetwopen-e2250996-s001.pdf [file jamanetwopen-e2250996-s001.pdf]

## Supplementary Online Content

Shadbolt C, Naufal E, Bunzli S, et al. Analysis of rates of completion, delays, and participant recruitment in randomized clinical trials in surgery. *JAMA Netw Open*. 2023;6(1):e2250996. doi:10.1001/jamanetworkopen.2022.50996

**eTable 1.** Detailed Summary of ClinicalTrials.gov Search Results

**eFigure.** Flow Diagram Summarizing Identification of Eligible Trials

**eTable 2.** Characteristics of 681 Trials Excluded Due to “Unknown” Study Status

**eTable 3.** Characteristics of 2542 Eligible Trials, by Trial Status

**eTable 4.** Proportions of Trials Completed Within Selected Thresholds for Delays

**eTable 5.** Proportions of Trials Completed Within Selected Thresholds for Recruiting Shortfalls

This supplementary material has been provided by the authors to give readers additional information about their work.

**eTable 1. Detailed summary of ClinicalTrials.gov search results**

| <b>Terms</b>                                                                                                                                                                                                               | <b>Search Results*</b> | <b>Entire Database**</b> |
|----------------------------------------------------------------------------------------------------------------------------------------------------------------------------------------------------------------------------|------------------------|--------------------------|
| Surgery                                                                                                                                                                                                                    | 16,940 studies         | 70,159 studies           |
| Surgical                                                                                                                                                                                                                   | 7,062 studies          | 29,615 studies           |
| Operations                                                                                                                                                                                                                 | 2,385 studies          | 9,778 studies            |
| Surgically                                                                                                                                                                                                                 | 402 studies            | 1,624 studies            |
| Invasive procedures                                                                                                                                                                                                        | 183 studies            | 769 studies              |
| Operative procedures                                                                                                                                                                                                       | 74 studies             | 227 studies              |
| Operative therapy                                                                                                                                                                                                          | 21 studies             | 61 studies               |
| <p>* Number of studies containing the term or synonym that were first posted to ClinicalTrials.gov between 01/01/2010 and 31/12/2014</p> <p>** Number of studies in the entire database containing the term or synonym</p> |                        |                          |

**eFigure. Flow diagram summarizing identification of eligible trials**

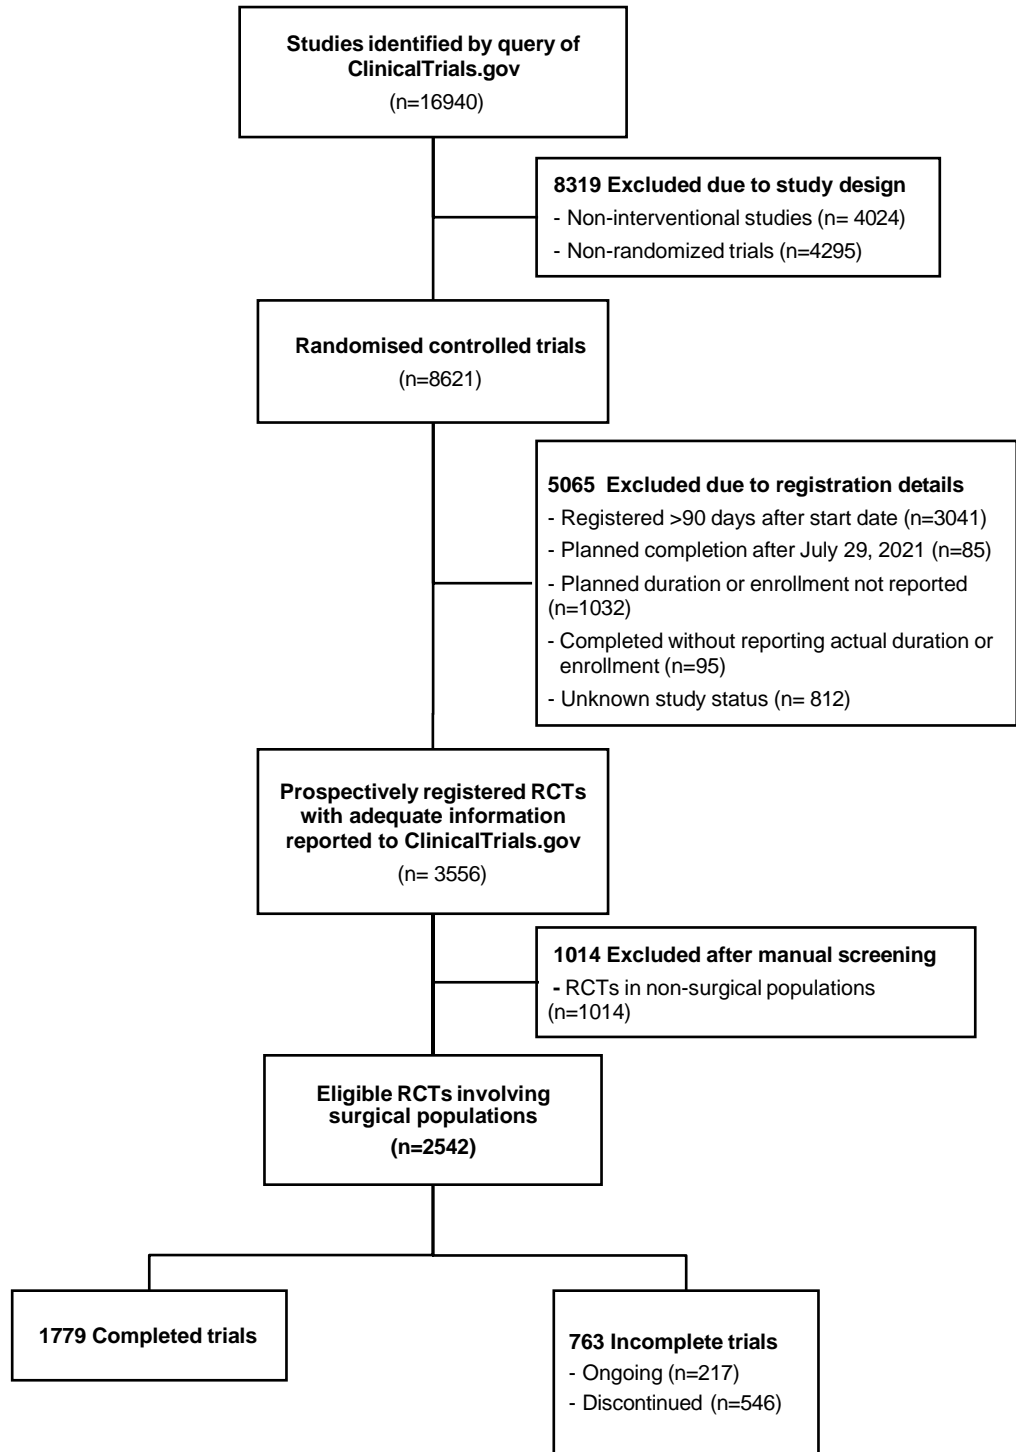

**eTable 2. Characteristics of 681 trials excluded due to “Unknown” study status**

|                                                                                                                                                                                               | <b>Known status</b> | <b>Unknown status*</b> | <b>Total</b>     |
|-----------------------------------------------------------------------------------------------------------------------------------------------------------------------------------------------|---------------------|------------------------|------------------|
|                                                                                                                                                                                               | <b>N=2,542</b>      | <b>N=681</b>           | <b>N=3,223</b>   |
| <b>Registration Year</b>                                                                                                                                                                      |                     |                        |                  |
| 2010                                                                                                                                                                                          | 386 (15.2%)         | 96 (14.1%)             | 482 (15.0%)      |
| 2011                                                                                                                                                                                          | 452 (17.8%)         | 117 (17.2%)            | 569 (17.7%)      |
| 2012                                                                                                                                                                                          | 537 (21.1%)         | 120 (17.6%)            | 657 (20.4%)      |
| 2013                                                                                                                                                                                          | 537 (21.1%)         | 150 (22.0%)            | 687 (21.3%)      |
| 2014                                                                                                                                                                                          | 630 (24.8%)         | 198 (29.1%)            | 828 (25.7%)      |
| <b>Body System</b>                                                                                                                                                                            |                     |                        |                  |
| Cardiovascular                                                                                                                                                                                | 370 (14.6%)         | 90 (13.2%)             | 460 (14.3%)      |
| Digestive                                                                                                                                                                                     | 457 (18.0%)         | 191 (28.0%)            | 648 (20.1%)      |
| Eye                                                                                                                                                                                           | 124 (4.9%)          | 32 (4.7%)              | 156 (4.8%)       |
| Female reproductive                                                                                                                                                                           | 207 (8.1%)          | 41 (6.0%)              | 248 (7.7%)       |
| Integumentary                                                                                                                                                                                 | 174 (6.8%)          | 33 (4.8%)              | 207 (6.4%)       |
| Mixed                                                                                                                                                                                         | 248 (9.8%)          | 53 (7.8%)              | 301 (9.3%)       |
| Musculoskeletal                                                                                                                                                                               | 551 (21.7%)         | 122 (17.9%)            | 673 (20.9%)      |
| Other                                                                                                                                                                                         | 290 (11.4%)         | 79 (11.6%)             | 369 (11.4%)      |
| Respiratory                                                                                                                                                                                   | 121 (4.8%)          | 40 (5.9%)              | 161 (5.0%)       |
| <b>Intervention type</b>                                                                                                                                                                      |                     |                        |                  |
| Drug                                                                                                                                                                                          | 929 (36.5%)         | 186 (27.3%)            | 1,115 (34.6%)    |
| Procedure                                                                                                                                                                                     | 513 (20.2%)         | 211 (31.0%)            | 724 (22.5%)      |
| Device                                                                                                                                                                                        | 331 (13.0%)         | 75 (11.0%)             | 406 (12.6%)      |
| Other                                                                                                                                                                                         | 367 (14.4%)         | 97 (14.2%)             | 464 (14.4%)      |
| Mixed                                                                                                                                                                                         | 402 (15.8%)         | 112 (16.4%)            | 514 (15.9%)      |
| <b>Lead Sponsor</b>                                                                                                                                                                           |                     |                        |                  |
| Industry                                                                                                                                                                                      | 413 (16.2%)         | 27 (4.0%)              | 440 (13.7%)      |
| Non-industry                                                                                                                                                                                  | 2,129 (83.8%)       | 654 (96.0%)            | 2,783 (86.3%)    |
| <b>No. of facilities</b>                                                                                                                                                                      |                     |                        |                  |
| Multi-site                                                                                                                                                                                    | 723 (28.4%)         | 116 (17.0%)            | 839 (26.0%)      |
| Single site                                                                                                                                                                                   | 1,739 (68.4%)       | 529 (77.7%)            | 2,268 (70.4%)    |
| Not reported                                                                                                                                                                                  | 80 (3.1%)           | 36 (5.3%)              | 116 (3.6%)       |
| <b>Masking</b>                                                                                                                                                                                |                     |                        |                  |
| Masked                                                                                                                                                                                        | 1,669 (65.7%)       | 410 (60.2%)            | 2,079 (64.5%)    |
| None                                                                                                                                                                                          | 870 (34.2%)         | 271 (39.8%)            | 1,141 (35.4%)    |
| Not reported                                                                                                                                                                                  | 3 (0.1%)            | 0 (0.0%)               | 3 (0.1%)         |
| <b>Target duration, mo. Med (IQR)</b>                                                                                                                                                         | 22.3 (12.2-35.5)    | 24.3 (12.2-36.5)       | 23.3 (12.2-36.5) |
| <b>Target enrolment, no. Med (IQR)</b>                                                                                                                                                        | 100 (58-200)        | 100 (60-200)           | 100 (60-200)     |
| * 131/812 studies excluded from study due to reporting an "unknown" study status are not presented here as they would have subsequently been excluded for examining a non-surgical population |                     |                        |                  |

**eTable 3. Characteristics of 2542 eligible trials, by trial status.**

|                                        | Completed on time   |                     | Completed w/ delays |                     | Discontinued        | Ongoing w/ delays   |
|----------------------------------------|---------------------|---------------------|---------------------|---------------------|---------------------|---------------------|
|                                        | Full enrolment      | Partial enrolment   | Full enrolment      | Partial enrolment   |                     |                     |
|                                        | N=370               | N=149               | N=796               | N=464               |                     |                     |
| <b>Registration Year</b>               |                     |                     |                     |                     |                     |                     |
| <b>2010</b>                            | 54 (14.6)           | 21 (14.1)           | 142 (17.8)          | 70 (15.1)           | 86 (15.8)           | 13 (6.0)            |
| <b>2011</b>                            | 59 (15.9)           | 24 (16.1)           | 134 (16.8)          | 91 (19.6)           | 109 (20.0)          | 35 (16.1)           |
| <b>2012</b>                            | 74 (20.0)           | 40 (26.8)           | 164 (20.6)          | 119 (25.6)          | 101 (18.5)          | 39 (18.0)           |
| <b>2013</b>                            | 73 (19.7)           | 33 (22.1)           | 173 (21.7)          | 93 (20.0)           | 118 (21.6)          | 47 (21.7)           |
| <b>2014</b>                            | 110 (29.7)          | 31 (20.8)           | 183 (23.0)          | 91 (19.6)           | 132 (24.2)          | 83 (38.2)           |
| <b>Body System</b>                     |                     |                     |                     |                     |                     |                     |
| <b>Cardiovascular</b>                  | 44 (11.9)           | 18 (12.1)           | 118 (14.8)          | 88 (19.0)           | 67 (12.3)           | 35 (16.1)           |
| <b>Digestive</b>                       | 65 (17.6)           | 25 (16.8)           | 133 (16.7)          | 76 (16.4)           | 105 (19.2)          | 53 (24.4)           |
| <b>Eye</b>                             | 17 (4.6)            | 6 (4.0)             | 44 (5.5)            | 24 (5.2)            | 25 (4.6)            | 8 (3.7)             |
| <b>Female reproductive</b>             | 39 (10.5)           | 11 (7.4)            | 79 (9.9)            | 33 (7.1)            | 32 (5.9)            | 13 (6.0)            |
| <b>Integumentary</b>                   | 20 (5.4)            | 14 (9.4)            | 53 (6.7)            | 28 (6.0)            | 43 (7.9)            | 16 (7.4)            |
| <b>Mixed</b>                           | 44 (11.9)           | 13 (8.7)            | 73 (9.2)            | 40 (8.6)            | 68 (12.5)           | 10 (4.6)            |
| <b>Musculoskeletal</b>                 | 66 (17.8)           | 30 (20.1)           | 182 (22.9)          | 95 (20.5)           | 130 (23.8)          | 48 (22.1)           |
| <b>Other</b>                           | 51 (13.8)           | 27 (18.1)           | 76 (9.5)            | 49 (10.6)           | 57 (10.4)           | 30 (13.8)           |
| <b>Respiratory</b>                     | 24 (6.5)            | 5 (3.4)             | 38 (4.8)            | 31 (6.7)            | 19 (3.5)            | 4 (1.8)             |
| <b>Intervention type</b>               |                     |                     |                     |                     |                     |                     |
| <b>Drug</b>                            | 172 (46.5)          | 60 (40.3)           | 301 (37.8)          | 154 (33.2)          | 190 (34.8)          | 52 (24.0)           |
| <b>Procedure</b>                       | 70 (18.9)           | 28 (18.8)           | 164 (20.6)          | 79 (17.0)           | 107 (19.6)          | 65 (30.0)           |
| <b>Device</b>                          | 40 (10.8)           | 19 (12.8)           | 110 (13.8)          | 65 (14.0)           | 71 (13.0)           | 26 (12.0)           |
| <b>Other</b>                           | 49 (13.2)           | 25 (16.8)           | 121 (15.2)          | 90 (19.4)           | 68 (12.5)           | 14 (6.5)            |
| <b>Mixed</b>                           | 39 (10.5)           | 17 (11.4)           | 100 (12.6)          | 76 (16.4)           | 110 (20.1)          | 60 (27.6)           |
| <b>Lead Sponsor</b>                    |                     |                     |                     |                     |                     |                     |
| <b>Industry</b>                        | 61 (16.5)           | 23 (15.4)           | 139 (17.5)          | 77 (16.6)           | 87 (15.9)           | 26 (12.0)           |
| <b>Non-industry</b>                    | 309 (83.5)          | 126 (84.6)          | 657 (82.5)          | 387 (83.4)          | 459 (84.1)          | 191 (88.0)          |
| <b>No. of facilities</b>               |                     |                     |                     |                     |                     |                     |
| <b>Multi-site</b>                      | 77 (20.8)           | 36 (24.2)           | 224 (28.1)          | 142 (30.6)          | 141 (25.8)          | 103 (47.5)          |
| <b>Single site</b>                     | 277 (74.9)          | 111 (74.5)          | 559 (70.2)          | 315 (67.9)          | 363 (66.5)          | 114 (52.5)          |
| <b>Not reported</b>                    | 16 (4.3)            | 2 (1.3)             | 13 (1.6)            | 7 (1.5)             | 42 (7.7)            | 0 (0.0)             |
| <b>Masking</b>                         |                     |                     |                     |                     |                     |                     |
| <b>Masked</b>                          | 281 (75.9)          | 101 (67.8)          | 555 (69.7)          | 300 (64.7)          | 328 (60.1)          | 104 (47.9)          |
| <b>None</b>                            | 89 (24.1)           | 47 (31.5)           | 241 (30.3)          | 162 (34.9)          | 218 (39.9)          | 113 (52.1)          |
| <b>Not reported</b>                    | 0 (0.0)             | 1 (0.7)             | 0 (0.0)             | 2 (0.4)             | 0 (0.0)             | 0 (0.0)             |
| <b>Target duration, mo. Med (IQR)</b>  | 16.2<br>(10.1-27.4) | 25.4<br>(13.2-43.6) | 15.3<br>(10.2-25.4) | 23.3<br>(12.2-32.4) | 24.4<br>(13.2-36.5) | 48.7<br>(27.3-70.1) |
| <b>Target enrolment, no. Med (IQR)</b> | 82.5<br>(50-150)    | 144<br>(69-286)     | 90<br>(50-168)      | 120<br>(68-231)     | 90<br>(50-196)      | 168<br>(78-369)     |

**eTable 4. Proportions of trials completed within selected thresholds for delays**

|                                | No. (%) of trials completed below threshold |                       |                |
|--------------------------------|---------------------------------------------|-----------------------|----------------|
| Percentage of planned duration | Industry (N=413)                            | Non-industry (N=2129) | Total (N=2542) |
| 110%                           | 103 (24.9)                                  | 501 (23.5)            | 604 (23.8)     |
| 125%                           | 140 (33.9)                                  | 640 (30.1)            | 780 (30.7)     |
| 150%                           | 193 (46.7)                                  | 836 (39.3)            | 1,029 (40.5)   |
| 175%                           | 231 (55.9)                                  | 970 (45.6)            | 1,201 (47.2)   |
| 200%                           | 251 (60.8)                                  | 1,071 (50.3)          | 1,322 (52.0)   |

**eTable 5. Proportions of trials completed within selected thresholds for recruiting shortfalls**

|                                  | No. (%) of trials completed above threshold |                       |                |
|----------------------------------|---------------------------------------------|-----------------------|----------------|
| Percentage of planned enrollment | Industry (N=413)                            | Non-industry (N=2129) | Total (N=2542) |
| 90%                              | 229 (55.4)                                  | 1,061 (49.8)          | 1,290 (50.7)   |
| 80%                              | 243 (58.8)                                  | 1,139 (53.5)          | 1,382 (54.4)   |
| 70%                              | 254 (61.5)                                  | 1,208 (56.7)          | 1,462 (57.5)   |
| 60%                              | 271 (65.6)                                  | 1,257 (59.0)          | 1,528 (60.1)   |
| 50%                              | 275 (66.6)                                  | 1,308 (61.4)          | 1,583 (62.3)   |
