# Supplementary material for: Analysis of Rates of Completion, Delays, and Participant Recruitment in Randomized Clinical Trials in Surgery
Source: PubMed Central journal article supplement (PMC9857498; doi:10.1001/jamanetworkopen.2022.50996), 2023-01-17
Supplement: jamanetwopen-e2250996-s002.pdf [file jamanetwopen-e2250996-s002.pdf]

## Data Sharing Statement

Shadbolt. Analysis of Rates of Completion, Delays, and Participant Recruitment in Randomized Clinical Trials in Surgery. *JAMA Netw Open*. Published January 17, 2023. doi:10.1001/jamanetworkopen.2022.50996

### Data

**Data available:** No

### Additional Information

**Explanation for why data not available:** Data from included trials is available through the ClinicTrials.gov and Access to Aggregate Content of ClinicalTrials.gov (AACT) databases
